# Supplementary material for: Long COVID affects home-isolated young patients
Source: Research Square preprint supplement (doi:10.21203/rs.3.rs-238339/v1), 2021-02-23
Supplement: Supplementary file 3 [file 1e9797d7b303de6d51f1304f.docx]

Table S1. Fatigue score at six months follow-up in COVID-19 patients (n=293) and seronegative controls (n=43) older than 15 years

|  |  | COVID-19 patients | | | Hospitalised vs outpatients | |
| --- | --- | --- | --- | --- | --- | --- |
|  | **Seronegative controls** | **All** | **Hospitalised** | **Home-isolated** | **Univariate** | **Multivariate** |
| Characteristic | **% (n/N)** | **% (n/N)** | **% (n/N)** | **% (n/N)** | **OR (CI)** | **aOR (CI)** |
|  | ***N=43*** | ***N=293*** | ***N=62*** | ***N=231*** |  |  |
| Female | 65% (28) | 51% (150) | 45% (28) | 53% (122) | 0.74 (0.42-1.29) | 0.50 (0.24-1.00)* |
| Age, median (IQR) | 42 (26-53)† | 47 (33-60) | 55.5 (45-68) | 45 (30-55) | 1.24 (1.20-1.29)* | 1.04 (1.02-1.06)* |
|  |  |  |  |  |  |  |
| Fatigue | 14% (6)† | 37% (108) | 63% (39) | 30% (69) | 3.98 (2.23-7.25)* |  |
| Severe fatigue | 2% (1) | 11% (33) | 24% (15) | 7% (17) | 4.02 (1.86-8.64)* |  |
| Total score, mean (CI) | 12.8 (11.9-13.7)† | 15.4 (14.8-15.9) | 18.6 (17.3-20.0) | 14.5 (13.9-15.0) | 1.29 (1.20-1.38)* |  |
|  |  |  |  |  |  |  |
| *Physical fatigue, mean (CI)* | *1.1 (1.0-1.2)* | *1.3 (1.3-1.4)* | *1.7 (1.5-1.8)* | *1.3 (1.2-1.3)* | *1.36 (1.06-1.67)** |  |
| Tiredness | 19% (8)† | 42% (122) | 66% (41) | 35% (81) | 3.62 (2.02-6.63)* | 0.64 (0.16-2.31) |
| Need for more rest | 19% (8)† | 39% (114) | 71% (44) | 30% (70) | 5.62 (3.08-10.63)* | 5.89 (1.69-22.14)* |
| Feeling sleepy | 16% (7)† | 32% (94) | 53% (33) | 26% (61) | 3.17 (1.78-5.69)* | 0.86 (0.32-2.30) |
| Problems starting things | 12% (5)† | 26% (77) | 48% (30) | 20% (47) | 3.67 (2.03-6.66)* | 0.85 (0.28-2.56) |
| Lack of energy | 19% (8)† | 35% (104) | 58% (36) | 29% (68) | 3.32 (1.87-5.97)* | 0.84 (0.24-2.77) |
| Reduced muscle strength | 5% (2)† | 24% (70) | 53% (33) | 16% (37) | 5.97 (3.26-11.07)* | 2.13 (0.80-5.73) |
| Feeling weak | 5% (2)† | 22% (63) | 45% (28) | 15% (35) | 4.61 (2.49-8.58)* | 1.01 (0.34-2.92) |
|  |  |  |  |  |  |  |
| *Mental fatigue, mean (CI)* | *1.0 (1.0-1.1)* | *1.3 (1.2-1.3)* | *1.5(1.4-1.6)* | *1.2 (1.1-1.2)* | *1.26 (0.99-1.59)* |  |
| Difficulties concentrating | 5% (2)† | 26% (77) | 53% (33) | 19% (44) | 4.84 (2.67-8.85)* | 3.36 (1.22-9.51)* |
| Slips of the tongue | 5% (2) | 11% (31) | 23% (14) | 7% (17) | 3.67 (1.68-7.96)* | 1.73 (0.59-5.05) |
| Difficulty finding words | 5% (2)† | 28% (81) | 45% (28) | 23% (53) | 2.77 (1.53-4.98)* | 0.45 (0.16-1.17) |
| Memory problems | 2% (1)† | 24% (69) | 44% (27) | 18% (42) | 3.47 (1.90-6.36)* | 1.09 (0.38-2.98) |

OR odds ratio, aOR adjusted odds ratio from binary logistic regression, CI 95% confidence interval, IQR interquartile range

* statistically significant difference at level p<0.05.

† Significantly lower frequency in COVID-19 negative controls.
